# Supplementary material for: The broadband emission of Cr3+-doped CaY2Mg2Ge3O12 and its applications for NIR detectors
Source: Royal Society of Chemistry journal article supplement (doi:10.1039/d3dt03370h), 2023-01-01
Supplement: d3dt03370h1.pdf [file d3dt03370h1.pdf]

## Supporting Information

### **The broadband emission of Cr<sup>3+</sup> doped CaY<sub>2</sub>Mg<sub>2</sub>Ge<sub>3</sub>O<sub>12</sub> and its applications for NIR detector**

Yuyan Li,<sup>1</sup> Ye Jin,<sup>1\*</sup> Fei Fang,<sup>1</sup> Huayan Lin,<sup>1</sup> Hongtao Chen,<sup>1</sup> Yanbin Xiong,<sup>2</sup> Yongfu Liu,<sup>3</sup> Li Ma,<sup>4</sup>  
Xiao-jun Wang<sup>4</sup>

*1 College of Science, Chongqing University of Technology, Chongqing 400054, China;*

*2 College of Materials Science and Engineering, Chongqing University of Technology, Chongqing 400054, China*

*3 Ningbo Institute of Materials Technology and Engineering (NIMTE), Chinese Academy of Sciences, Ningbo, Zhejiang 315201, China;*

*4 Department of Physics, Georgia Southern University, Statesboro, GA 30460, USA*

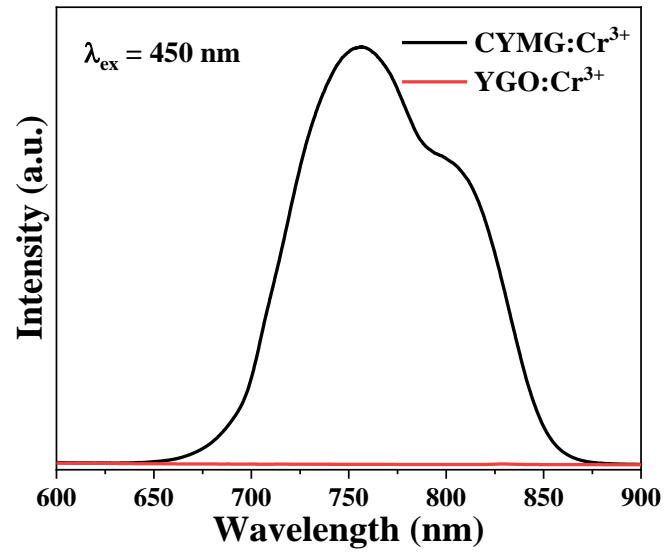

**Figure S1.** Emission spectra of Cr<sup>3+</sup> in CYMG and YGO.

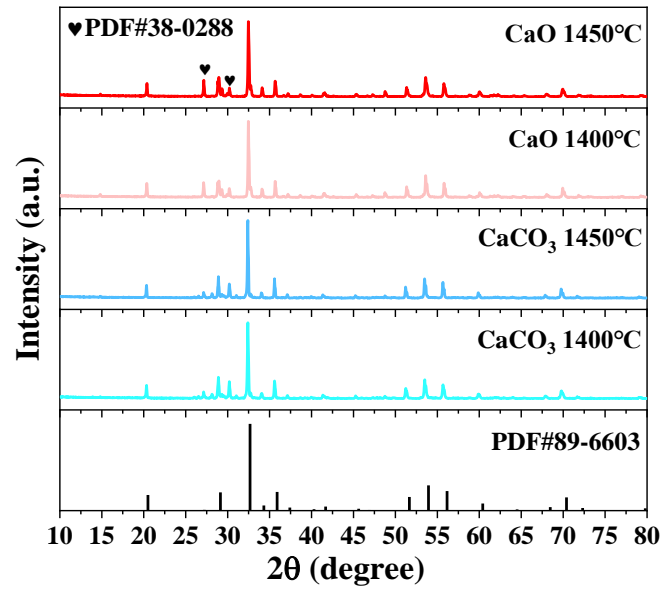

**Figure S2.** XRD patterns of different Ca sources.

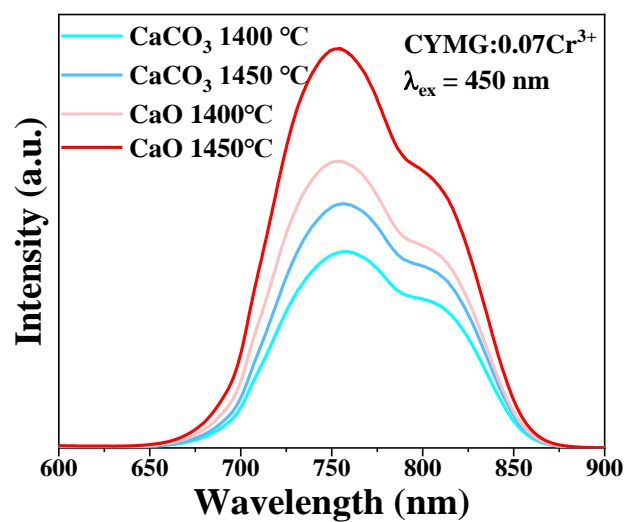

**FigureS3.** Luminescence spectra of CaCO<sub>3</sub> and CaO as Ca sources at two different temperatures.

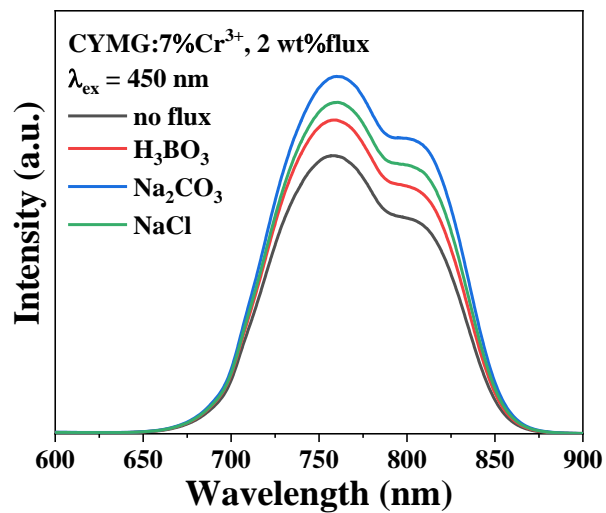

Figure S4. Emission spectra of CYMG: 7% Cr<sup>3+</sup> with different fluxes.

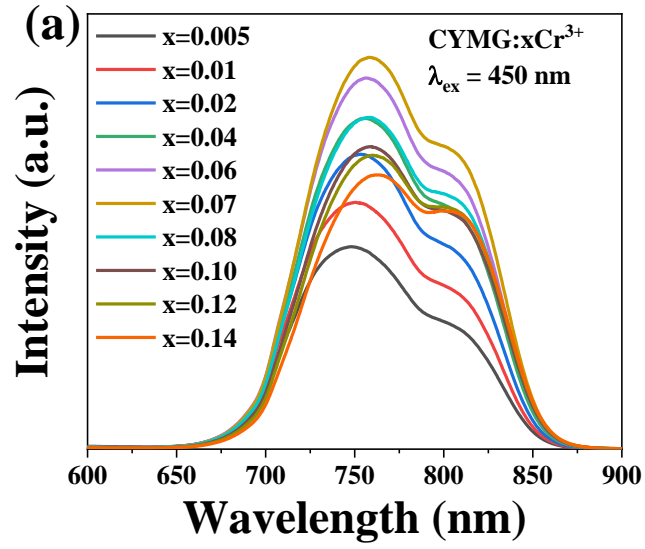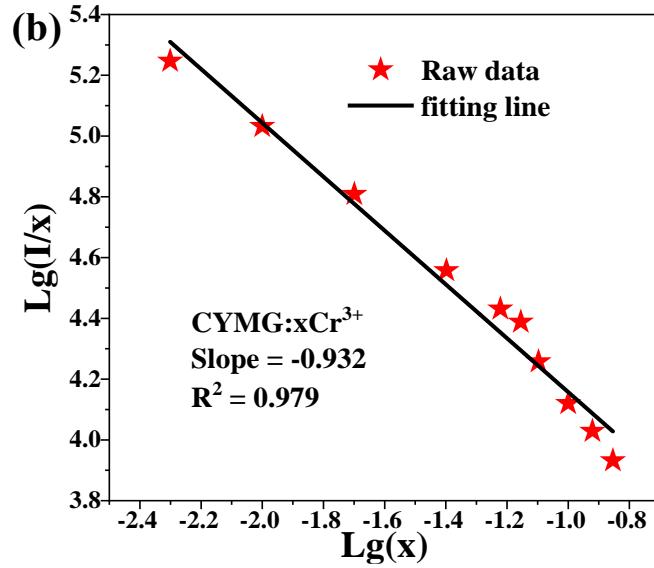

Figure S5. (a) PL of CYMG: $x\text{Cr}^{3+}$  excited at 450 nm; (b) Relationship between  $\log(I/x)$  and  $\log(x)$  of CYMG: $x\text{Cr}^{3+}$

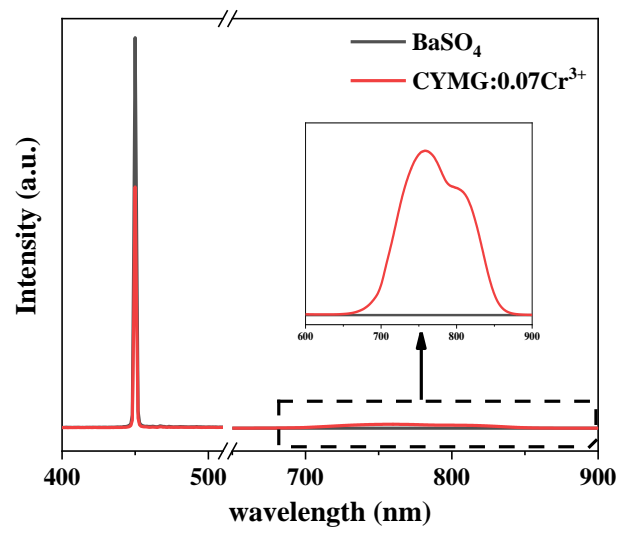

**Figure S6.** The internal quantum efficiency of CYMG: $x\text{Cr}^{3+}$

**Table S1.** Emission peak, FWHM, temperature stability and IQE of Cr<sup>3+</sup> phosphors doped with different hosts

| phosphor                                                                            | $\lambda_{em}$ (nm) | FWHM | I <sub>150°C</sub> (%) | IQE (%) | Ref.      |
|-------------------------------------------------------------------------------------|---------------------|------|------------------------|---------|-----------|
| Na <sub>3</sub> ScF <sub>6</sub> :Cr <sup>3+</sup>                                  | 774                 | 108  | 30                     | 91.5    | S1        |
| ScBO <sub>3</sub> :Cr <sup>3+</sup>                                                 | 800                 | 120  | 50                     | 65      | S2        |
| Ca <sub>2</sub> LuZr <sub>2</sub> Al <sub>3</sub> O <sub>12</sub> :Cr <sup>3+</sup> | 754                 | 117  | 60                     | 69      | S3        |
| BaMgAl <sub>10</sub> O <sub>17</sub> :Cr <sup>3+</sup>                              | 696                 | 92.6 | 63                     | 94      | S4        |
| LiScSi <sub>2</sub> O <sub>6</sub> :Cr <sup>3+</sup>                                | 845                 | 156  | 75                     | 64.4    | S5        |
| LiInSi <sub>2</sub> O <sub>6</sub> :Cr <sup>3+</sup>                                | 840                 | 143  | 77                     | 75      | S6        |
| CaLu <sub>2</sub> Mg <sub>2</sub> Si <sub>3</sub> O <sub>12</sub> :Cr <sup>3+</sup> | 750                 | /    |                        | 85.7    | S7        |
| CaY <sub>2</sub> Mg <sub>2</sub> Ge <sub>3</sub> O <sub>12</sub> :Cr <sup>3+</sup>  | 758                 | 115  | 81                     | 81.1    | This work |



**Table S2.** Photoelectric characteristics of NIR pc-LED devices under the different driving current

| Current<br>(mA) | Input power<br>(mW) | Output power (mW)             | Output power (mW)       | Conversion efficiency |
|-----------------|---------------------|-------------------------------|-------------------------|-----------------------|
|                 |                     | (74.525%)<br>Measurement data | (100%)<br>Complete data |                       |
| 20              | 51                  | 4                             | 5.367                   | 10.524                |
| 50              | 133                 | 10                            | 13.418                  | 10.089                |
| 100             | 276                 | 19                            | 25.495                  | 9.237                 |
| 150             | 426                 | 25                            | 33.546                  | 7.875                 |
| 200             | 580                 | 31                            | 41.597                  | 7.172                 |
| 250             | 740                 | 34                            | 45.223                  | 6.111                 |
| 300             | 907                 | 35                            | 46.964                  | 5.178                 |
| 350             | 1078                | 36                            | 48.306                  | 4.481                 |
| 400             | 1256                | 37                            | 49.648                  | 3.953                 |

### Reference

- 1 F. He, E. Song, Y. Zhou, H. Ming, Z. Chen, J. Wu, P. Shao, X. Yang, Z. Xia, Q. Zhang, *Adv. Funct. Mater.* 2021, **31** (36), 2103743.
- 2 M.-H. Fang, P.-Y. Huang, Z. Bao, N. Majewska, T. Lesniewski, S. Mahlik, M. Grinberg, G. Leniec, S. M. Kaczmarek, C.-W. Yang, K.-M. Lu, H.-S. Sheu, R.-S. Liu, *Chem. Mater.* 2020, **32** (5), 2166-2171.
- 3 L. Zhang, S. Zhang, Z. Hao, X. Zhang, G.-H. Pan, Y. Luo, H. Wu, Zhang, J, *J. Mater. Chem. C* 2018, **6** (18), 4967-4976.
- 4 L. You, R. Tian, T. Zhou, R.-J. Xie, *Chem. Eng. J.* 2021, **417**, 129224.
- 5 Y. Yan, M. Shang, S. Huang, Y. Wang, Y. Sun, P. Dang, J. Lin, *ACS Appl. Mater. Interfaces* 2022, **14** (6), 8179-8190.
- 6 X. Xu, Q. Shao, L. Yao, Y. Dong, J. Jiang, *Chem. Eng. J.* 2020, **383**, 123108.
- 7 H. Xiao, J. Zhang, L. Zhang, H. Wu, H. Wu, G. Pan, F. Liu, J. Zhang, *Adv. Optical Mater.* 2021, **9**, 2101134.
